# Supplementary material
Source: PubMed Central journal article supplement (PMC1829372)
Supplement: 7601603s2.pdf [file 7601603s2.pdf]

A.

Transgenic *RD29A* promoter

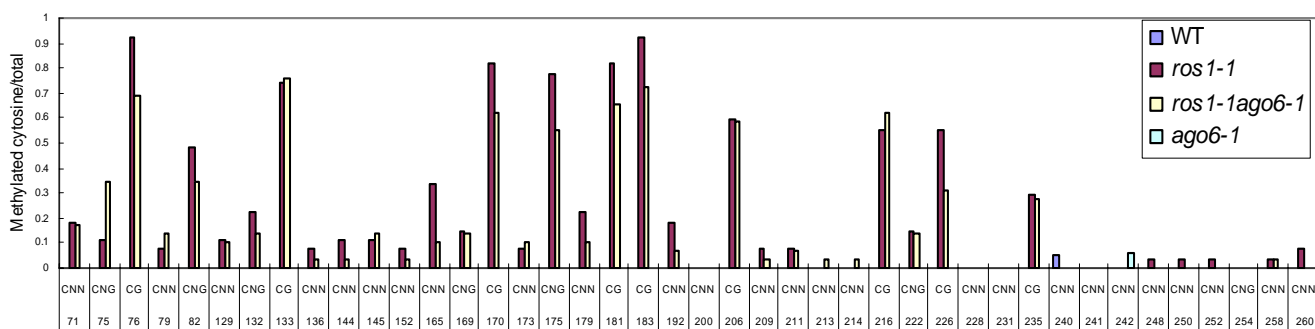

B.

Endogenous *RD29A* promoter

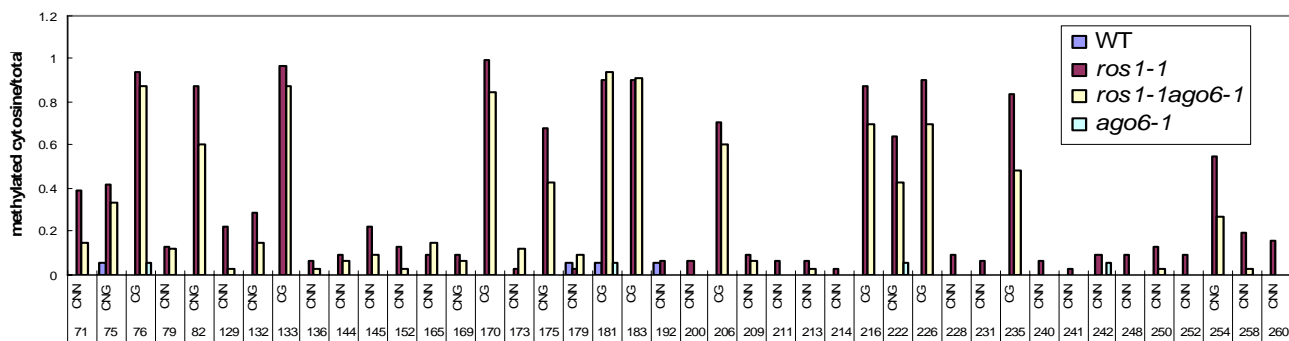

Supplemental Fig. 1

A.

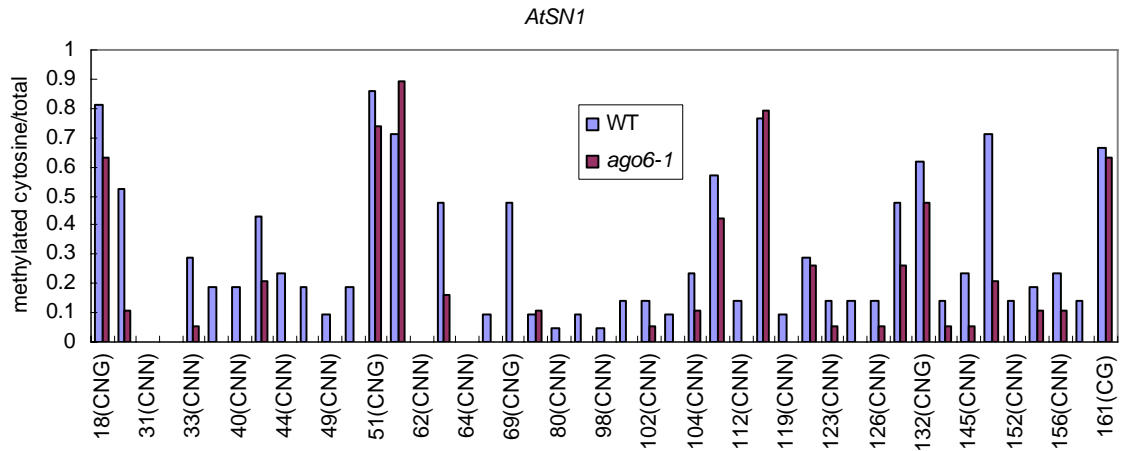

B.

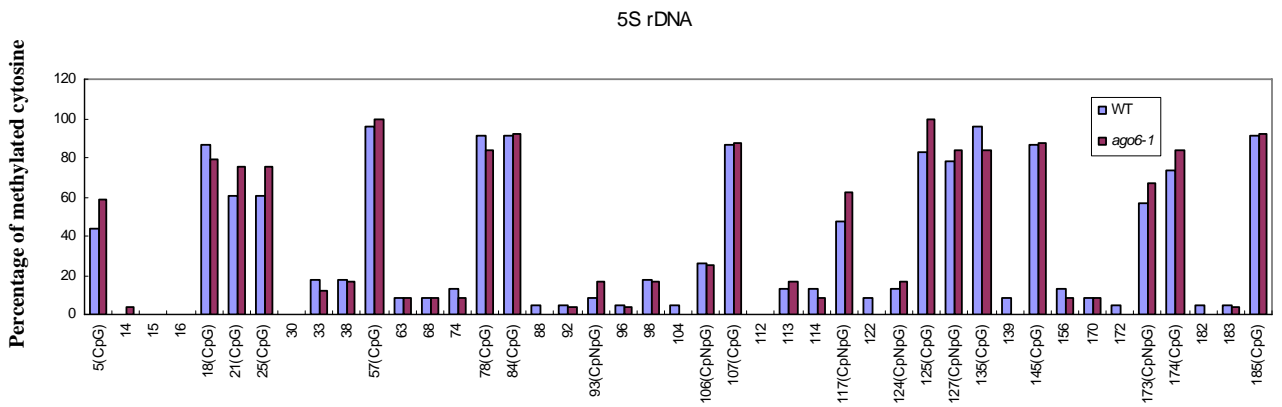

Supplemental Fig. 2

A.

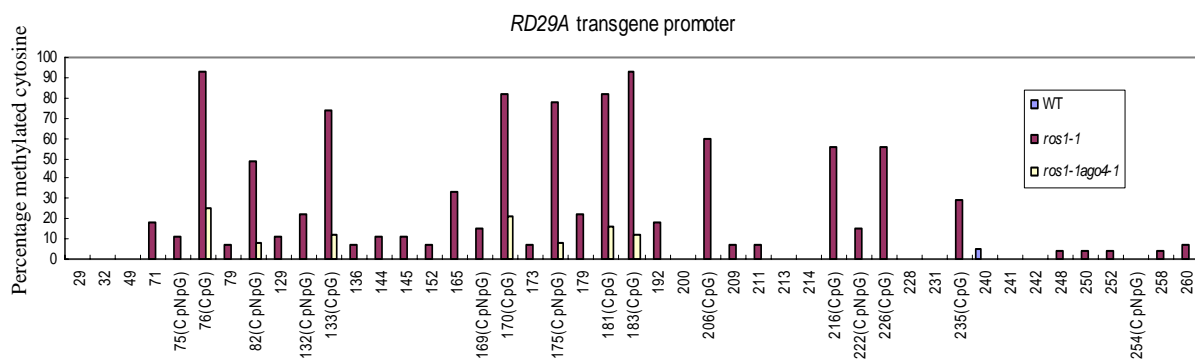

B.

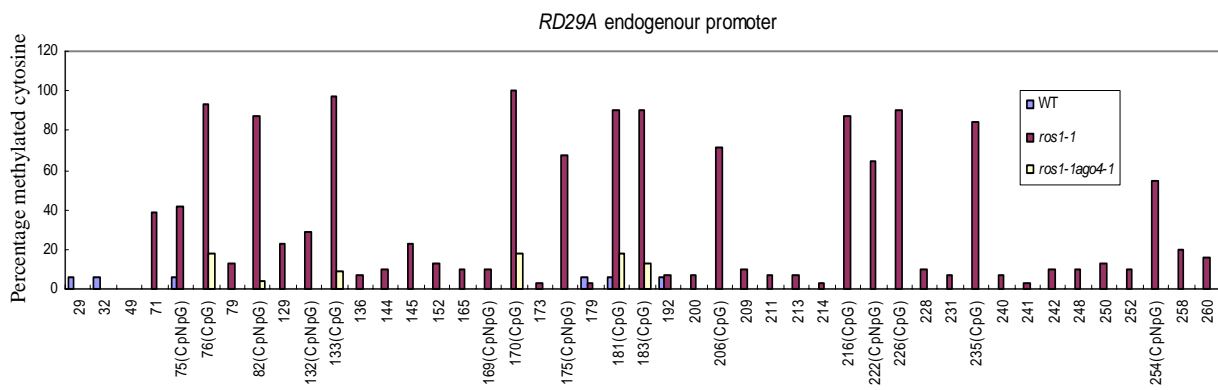

Supplemental Fig. 3

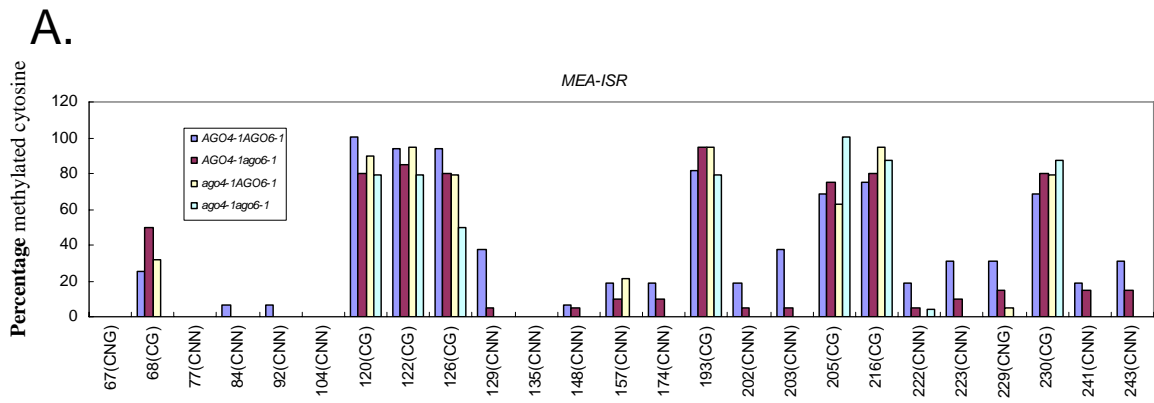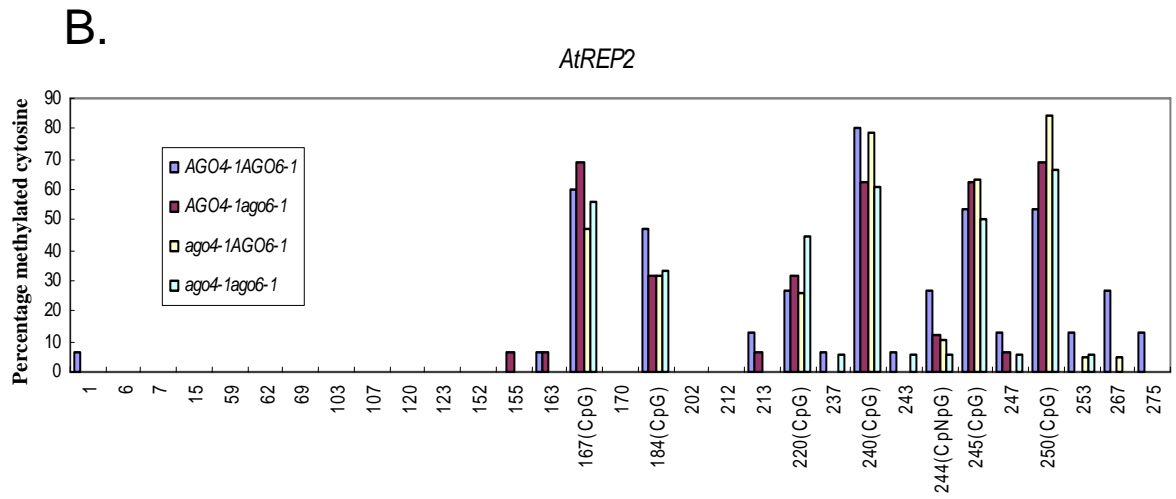

**Supplemental Fig. 4**

A.

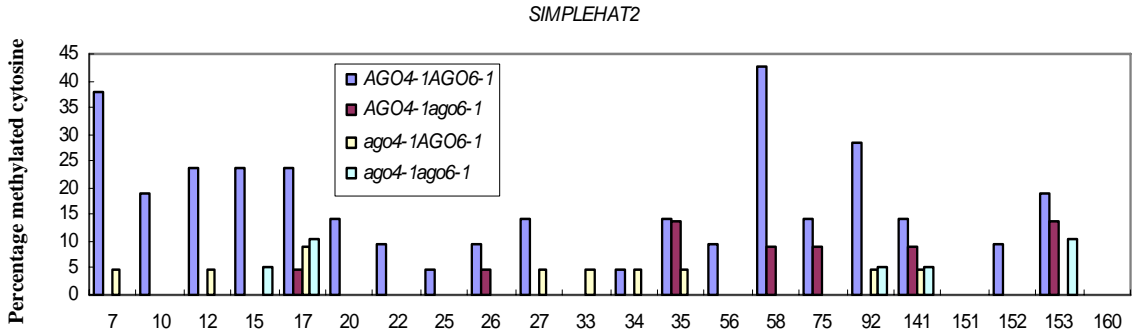

B.

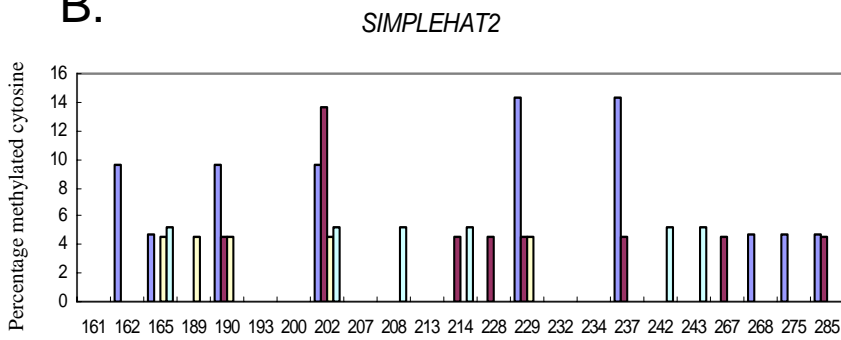

C. *SIMPLEHAT2*

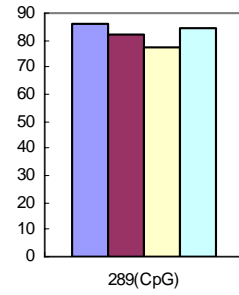

D.

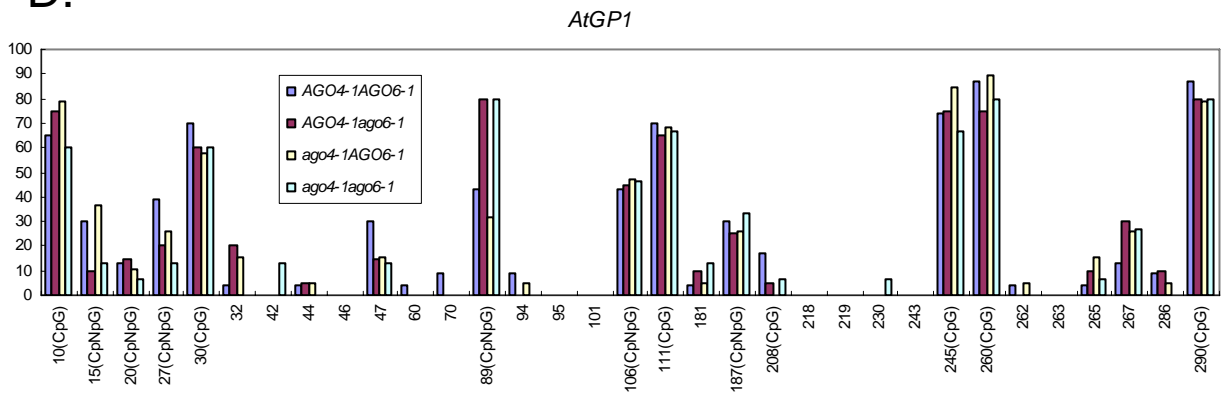

Supplemental Fig. 5
